# Supplementary material for: Effect of Colchicine vs Usual Care Alone on Intubation and 28-Day Mortality in Patients Hospitalized With COVID-19: A Randomized Clinical Trial
Source: PubMed Central journal article supplement (PMC8717104; doi:10.1001/jamanetworkopen.2021.41328), 2021-12-29
Supplement: jamanetwopen-e2141328-s001.pdf [file jamanetwopen-e2141328-s001.pdf]

1

# Protocol

2

3

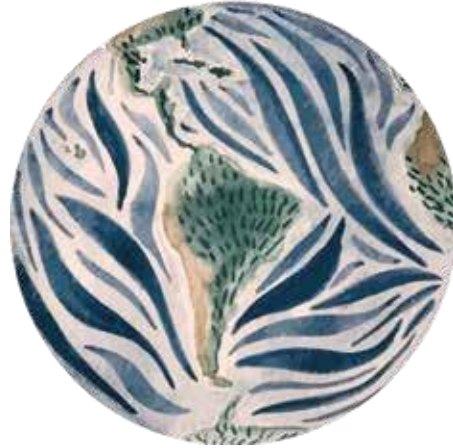

4

5

6

## **The ECLA PHRI COLCOVID Trial**

7 A simple, pragmatic, randomized open controlled trial to test the effects of colchicine  
8 on moderate/high-risk hospitalized COVID-19 patients with the aim of reducing  
9 mortality and/or new requirement for mechanical ventilation.

10

11 Versión 2.1

12 Date: February, 2021

13

|    |                                                    |    |
|----|----------------------------------------------------|----|
| 14 | <b>Table of contents</b>                           |    |
| 15 | Background and rationale .....                     | 4  |
| 16 | Selection of patients .....                        | 5  |
| 17 | Informed Consent .....                             | 5  |
| 18 | Terminology .....                                  | 5  |
| 19 | Summary of the proposal.....                       | 5  |
| 20 | Simplicity of procedures.....                      | 6  |
| 21 | Randomization.....                                 | 6  |
| 22 | Colchicine dosage schedule.....                    | 6  |
| 23 | Management of patients in the study .....          | 7  |
| 24 | Follow-up .....                                    | 7  |
| 25 | Major outcomes .....                               | 7  |
| 26 | Data monitoring .....                              | 7  |
| 27 | Sample size calculation .....                      | 7  |
| 28 | Data security & Publication.....                   | 8  |
| 29 | Objectives .....                                   | 8  |
| 30 | Endpoints.....                                     | 8  |
| 31 | Drug discontinuation and patient withdrawalt ..... | 9  |
| 32 | Adverse reaction reporting .....                   | 9  |
| 33 | Statistical considerations .....                   | 9  |
| 34 | Local Regulations / Declaration of Helsinki .....  | 10 |
| 35 | Publication.....                                   | 10 |
| 36 | References .....                                   | 10 |
| 37 | Apendix A .....                                    | 12 |
| 38 |                                                    |    |
| 39 |                                                    |    |

40 **Document History**

| Version | Date of release | Major modifications from previous version                                                                                       |
|---------|-----------------|---------------------------------------------------------------------------------------------------------------------------------|
| 1.2     | 19-Mar-20       | Initial version (protocol V1.2)                                                                                                 |
| 1.2     | 25-Apr-20       | Title – Brief Summary                                                                                                           |
| 2.0     | 30-Nov-21       | Eligibility criteria<br>Co-primary outcomes<br>Secondary outcomes<br>Sample size recalculation<br>ASS - Rivaroxaban arm allowed |
| 2.1     | 5-Feb-21        | Secondary Outcomes specification                                                                                                |

41

42

43

44

45

46 **Background and rationale**

47 Various anti-viral treatments are being tested in clinical trials worldwide. The WHO  
48 launched a simple, pragmatic worldwide open-label trial to test Remdesivir,  
49 Lopinavir/Ritonavir, Interferon and Hydroxy- chloroquine or Cloroquine (1).

50 The most important complication of COVID-19 severe cases is respiratory failure from  
51 severe acute respi- ratory syndrome (SARS), the leading cause of mortality.  
52 Accumulating evidence suggests that patients with severe COVID-19 might have a  
53 cytokine storm syndrome, a hyperinflammatory syndrome characterized by a fulminant  
54 and fatal hypercytokinemia and multiorgan failure.

55 The proposed pathophysiological mechanism of cytokine storm and inflammatory  
56 cascade activation is based on evidence collected primarily during the SARS-CoV and  
57 MERS-CoV epidemics (with a significant increase in IL1B, IL6, IL12, IFN $\gamma$ , IP10,  
58 TNF $\alpha$ , IL15, and IL17 among others). The data collected during the pandemic with  
59 COVID-19 also shows a significant increase in inflammatory cytokines (GCSF, IP10,  
60 MCP1, MIP1A, and TNF $\alpha$ , among others) in sicker patients admitted to intensive care.  
61 In the absence of effective treatments for the management of patients with COVID-19  
62 and respiratory failure, the immunomodulatory and anti-inflammatory effect of  
63 colchicine on cytokines involved in the hyper-inflammatory state is postulated (2).  
64 Several lines of research worldwide are testing powerful anti-inflammatory drugs for  
65 the pandemic, with different options including steroids, cytokine blockers, and other  
66 potent anti-inflam- matory agents. Steroids are partially contraindicated in viral  
67 infections.

68 Colchicine is a powerful anti-inflammatory drug approved for the treatment or  
69 prevention of gout and Familial Mediterranean Fever at doses ranging between 0.3 mg  
70 and 2.4 mg/day. Its mechanism of action is through the inhibition of tubulin  
71 polymerization, as well as through potential effects on cellular adhesion molecules and  
72 inflammatory chemokines. It might also have direct anti-inflammatory effects by  
73 inhibiting key inflammatory signalling networks known as inflammasome and pro-  
74 inflammatory cytokines. Additionally, evidence suggests that colchicine exerts a direct  
75 anti-inflammatory effect by inhibiting the synthesis of tumor necrosis factor alpha and  
76 IL-6, monocyte migration, and the secretion of matrix metalloproteinase-9. Through the  
77 disruption of the cytoskeleton, colchicine is believed to suppress secretion of cytokines  
78 and chemokines as well as in vitro platelet aggregation (3). All these are potentially  
79 beneficial effects that might diminish or ameliorate the COVID-19 inflammatory storm  
80 associated with severe forms of the disease. Importantly, in one contemporary trial low-  
81 dose colchicine administered to patients who survived from acute coronary syndrome  
82 shows a statistically significantly reduction of cardiovascu- lar complications (4).

83 We have therefore designed in a simple, pragmatic randomized controlled trial to test  
84 the effects of colchicine on severe hospitalized COVID-19 cases with the aim of  
85 reducing mortality.

86

87

88

89 **Selection of patients**

90 **Inclusion Criteria (case definition)**

- 91 • Consented adults (age  $\geq 18$  years) and
- 92 • COVID-19 suspicious and
- 93 • Admitted to hospital or already in hospital and
- 94 • COVID-19 suggestive symptoms (fever or febrile equivalent, loss of smell and taste,  
95 fatigue, etc.) that may be present or absent at randomization time and
- 96 • SARS (severe acute respiratory syndrome)
  - 97 ◦ shortness of breath (dyspnea) or
  - 98 ◦ image of typical or atypical pneumonia or
  - 99 ◦ oxygen desaturation ( $SpO_2 \leq 93$ )

100 **Exclusion criteria**

- 101 • Clear indication or contraindication for the use of colchicine
- 102 • Pregnant or breastfeeding female.
- 103 • Chronic renal disease with creatinine clearance  $< 15$  ml/min/m<sup>2</sup>
- 104 • Negative PCR test for SARS-COV2

105 **Informed Consent**

106 Given the exceptional characteristics of the current pandemic, with partial (or total)  
107 restriction to access to the patient by both family members and health personnel, we  
108 have followed the International Ethical Guidelines for Health-Related Research With  
109 Human Beings (Geneva 2016) prepared by the Council of International Organizations  
110 of Medical Sciences (CIOMS) in collaboration with the World Health Organization  
111 (WHO). Based on the above-mentioned guidelines, three methods of informed consent  
112 obtention will be accepted:

- 113 - Written consent
- 114 - Oral consent in the presence of two witnesses belonging to the health care  
115 team, who will document the procedure
- 116 - In case the patient cannot give consent due to a depressed conscious status, it  
117 may be included <sup>[1]</sup><sub>[SEP]</sub> based on the decision of at least two members of the  
118 health team, one of whom must be a doctor. This will be well documented

119 **Terminology**

120 The novel coronavirus-induced disease first described in 2019 in China is designated  
121 COVID-19 (or COVID), and the pathogen itself (an RNA virus) is SARS-coronavirus-2  
122 (SARS-CoV-2).

123 **Summary of the proposal**

124 As of March 23, 2020, 08:09 GMT, COVID-19 has been confirmed in 341,334 people  
125 worldwide and 14,746 are the associated fatalities. The mortality rate is difficult to  
126 assess due to the lack of a reliable number of cases (N), although is higher when  
127 compared to influenza outbreaks. Current focus has been on the development of novel  
128 therapeutics, including antivirals and vaccines. Nevertheless, accumulating evidence  
129 suggests that hospitalized patients with COVID-19 might have a cytokine storm

130 syndrome. The identification and treatment of hyperinflammation using existing and  
131 approved therapies with proven safety profiles might mitigate this associated condition  
132 and impact mortality.

133 The pandemic will affect our country in the near future. The wave and the exponential  
134 growth of cumulative cases have not yet arrived, and we are getting ready preparing for  
135 that contingency. We have been trained for years in a rigorous research environment.  
136 We cannot expect a more appropriate time in our professional lives to face this  
137 pandemic with what we know: investigating on the front line to improve the population  
138 health<sup>5,6</sup>.

139 We have worked intensively for the last days and outlined the basis of this research  
140 proposal that will attempt to mitigate the morbidity and mortality of severe cases of  
141 COVID-19. Based on the experience of China and Italy and with the help and advice of  
142 friends and experts in the area of clinical epidemiology, clinical research, cardiology,  
143 and infectious diseases, we have developed a contingency protocol to be launched in the  
144 coming days.

145 The rationale is to mitigate the inflammatory storm associated with severe cases of  
146 COVID-19 with the use of moderate doses of colchicine during the hospital stay of  
147 patients with severe acute respiratory syndrome (SARS) and suspicion of COVID-19,  
148 which hopefully might result in a clinical benefit.

#### 149 **Simplicity of procedures**

150 To facilitate collaboration of even overcrowded hospitals, patient enrolment and  
151 randomization (via the internet) and all other trial procedures are greatly simplified, and  
152 no paperwork is required. Once a hospital has obtained approval, electronic entry of  
153 patients who have given informed consent takes only a few minutes. When entry is  
154 finished, the randomly allocated treatment is displayed on the screen and confirmed by  
155 electronic messaging.

#### 156 **Randomization**

157 Those patients who meet the inclusion criteria and do not have any exclusion criteria  
158 will be centrally randomized, in a 1 to 1 ratio, to receive colchicine plus standard  
159 treatment or standard treatment. The assigned treatment will take place according to a  
160 computer-generated system. The randomization numbers of the patients will be assigned  
161 sequentially in the order in which the subjects are enrolled and will be stratified by  
162 intubation status at randomization (intubated/non intubated). Researchers will use an  
163 interactive web response system (IWRS) to obtain a treatment assignment.

#### 164 **Colchicine dosage schedule**

165 The colchicine dosage schedule will vary according to the following scenarios:

- 166 - In patients not receiving Lopinavir/Ritonavir
- 167     o Loading dose of 1.5 mg followed by 0.5 mg after two hours (day 1)
- 168     o The next day 0.5 mg bid for 14 days or until discharge.
- 169 - In patients receiving Lopinavir/Ritonavir
- 170     o Loading dose of 0.5 mg (day 1)

- 171                   ○ After 72 hours from the loading dose, 0.5 mg every 72 hours for 14
- 172                   days or until discharge.
- 173           - Patients under treatment with Colchicine that are starting with
- 174           Lopinavir/Ritonavir
- 175                   ○ Dose of 0.5 mg 72 hours after starting Lopinavir/Ritonavir.
- 176                   ○ Continue with 0.5 mg every 72 hours for 14 days or until discharge.

177 Drug interactions refer to table 1 Appendix A.

178 Only the oral route will be used except in the case of patients associated with  
179 mechanical ventilation or with contraindications to the oral route, in whom it will be  
180 administered by nasogastric tube.

### 181 **Management of patients in the study**

182 At all times the patient's medical team remains solely responsible for decisions about  
183 that patient's care and safety. Hence, if the team decides that deviation from the  
184 randomly allocated treatment arm is definitely necessary, this should be done.

### 185 **Follow-up**

186 Information regarding trial outcomes, adverse events, potential adverse reactions, and  
187 active treatment adherence will be recorded in-hospital and up to 28 days if the patient  
188 is still hospitalized. For patients discharged, the investigators will assess the patient's  
189 vital status on day 28.

190 Data to be reported include which study drugs were given (and for how many days),  
191 whether mechanical ventilation or any type of intensive care was received (and, if so,  
192 when), date of discharge, or date and cause of death. If no report is received within 6  
193 weeks of study entry, an electronic reminder will be sent.

194 Drug safety Suspected unexpected serious adverse reactions that are life-threatening  
195 must be reported within 24 hours of being diagnosed, without waiting for death or  
196 discharge.

### 197 **Major outcomes**

198 The Co-primary outcomes are a Composite outcome (New requirement for mechanical  
199 ventilation or death) and mortality for all causes

### 200 **Data monitoring**

201 A global Data and Safety Monitoring Committee will keep the accumulating drug safety  
202 results and major outcome results under regular review.

### 203 **Sample size calculation**

204 A minimum sample size of 1200 patients would provide 80% power to detect a relative  
205 risk reduction of 27% in the treated group at a two-sided significance level of  $\alpha = 0.05$   
206 if a 24% 28-day composite outcome in the control group is assumed.

207 The ECLA PHRI COLCOVID Trial allows randomization to another trial, specifically

208 patients included in the trial might be (or not) randomized to an antithrombotic strategy.

209 Adaptive design The ECLA PHRI COLCOVID Scientific Committee may decide to  
210 add novel treatment arms while the trial is in progress. Conversely, it may decide to  
211 discontinue some treatment arms, especially if the Data and Safety Monitoring  
212 Committee reports, based on interim analyses, that one of the trial treatments defini-  
213 tely affects mortality.

214

## 215 **Data security & Publication**

216 Patient information will be encrypted. Those analysing it will use only anonymized  
217 data, and no identifiable patient details will appear in any publications. This national  
218 collaboration is coordinated through the ECLA network. Any wholly reliable interim  
219 findings will be disseminated rapidly by ECLA and published including the names of  
220 the collaborators.

## 221 **Objectives**

222 The aim of this trial is to test local standard of care plus colchicine versus local standard  
223 of care alone in moderate/severe COVID-19 hospitalized patients with the aim of  
224 reducing mortality and/or new requirement for mechanical ventilation.

225

## 226 **Endpoints**

### 227 **Co-primary endpoints**

228 The first co-primary is the composite of a new requirement for mechanical ventilation  
229 or death evaluated at 28 days after randomization. For this endpoint, participants  
230 intubated at the time of randomization will be followed for death.

231 The second co-primary is death assessed at 28 days after randomization.

232 A fixed-sequence statistical approach will be adopted. This strategy allows testing each  
233 of the null hypotheses at the same significance level alpha ( $\alpha = 0.05$ ) without any  
234 adjustment, as long as the null hypotheses to be tested are hierarchically ordered and  
235 tested in a pre-defined sequential order: firstly the composite outcome, moving to the  
236 second co-primary endpoint (death) only after success on the first co-primary endpoint.

### 237 **Secondary endpoints**

- 238 1. New requirement for mechanical ventilation or death from respiratory failure
- 239 2. New requirement for mechanical ventilation or death from non-respiratory failure
- 240 3. Mortality due to respiratory failure
- 241 4. Mortality due to non-respiratory failure
- 242 5. In hospital - Composite outcome
- 243 6. In hospital - Mortality
- 244 7. Composite outcome (New requirement for mechanical ventilation or death)
- 245 evaluated in Non-intubated population



- 246 8. Mortality evaluated in Non-intubated population  
247 9. Mean WHO descriptive score of COVID-19 during hospitalization  
248 10. Highest WHO descriptive score of COVID-19 during hospitalization  
249

## 250 **Drug discontinuation and patient withdrawal**

251 At all times the patient's medical team remains solely responsible for decisions about  
252 that patient's care and safety. Hence, if the medical team decides that deviation from the  
253 randomly allocated treatment arm is definitely necessary then this should be done. The  
254 colchicine administration must be stopped if the team suspects any serious unexpected  
255 drug-related reaction that is life-threatening. Patients are free to withdraw from study  
256 treatment at any time, but could still remain in the study, with in-hospital outcome  
257 reported to the study at death or discharge. Patients are also free to withdraw from the  
258 whole study at any time without any consequence and would continue to be offered the  
259 local standard of care (but would not be reported on).

## 260 **Adverse reaction reporting**

261 Any serious unexpected adverse reaction that is life-threatening must be reported  
262 through the study website within 24 hours.

## 263 **Statistical considerations**

264 Efficacy analysis will be done on an intention to-treat (ITT) basis.

265 Cox proportional hazard regression models will be used to estimate Hazard Ratios (HR)  
266 and 95% confidence intervals (CI) for co-primary and secondary outcomes evaluated at  
267 28-days post-randomization.

268 Since the randomization was stratified by intubation status, these estimations will be  
269 adjusted by this factor.

270 For in-hospital secondary outcomes, relative risk (RR) and 95% confidence intervals  
271 (CI) will be computed.

272 Kaplan Meier survival curves will be constructed for each group to estimate the  
273 cumulative outcome incidence as a function of time over the 28 days.

274 Pre-specified subgroup analyses will be performed for the composite primary endpoint  
275 according to the following subgroups defined by characteristics at randomization: age  
276 ( $\leq 60$  years,  $> 60$  years), sex, positive PCR (laboratory-confirmed SARS-CoV-2 through  
277 PCR), history of diabetes, history of hypertension, history of coronary artery disease,  
278 history of chronic lung disease, smoking status (current vs. former/never), use of renin-  
279 angiotensin related medications (yes/no), respiratory status, oxygen desaturation status,  
280 pneumonia at randomization and days between admission date and randomization date.

281 Estimated HR with 95% CI for each stratum will be reported without adjustment for  
282 multiple comparisons. Interaction test p values will be computed considering Cox  
283 regression models that include an interaction term between the treatment assignment  
284 and the subgroup of interest. No formal conclusions will be drawn from this subgroup  
285 analysis.

286 For safety analyses, patients will be analyzed according to their treatment, irrespective  
287 of the random allocation. Adverse events of particular interest will be captured on the  
288 case report forms.

## 289 **Sample size**

290 When the trial was designed, there was limited information about clinical outcomes in  
291 hospitalized patients with Covid-19. The original design required a total sample size of  
292 2500 patients, which would provide 80% power to detect a relative risk reduction of  
293 19% in the treated group if the in-hospital mortality for the control group was 25% at a  
294 two-sided significance level of  $\alpha = 0.05$ .

295 As the trial progressed and considering the pandemic status in our country, on  
296 November 30, 2020, we decided to amend the protocol and recalculate the sample size.

297 Assuming a 24% 28-day composite outcome in the control group, a minimum sample  
298 size of 1200 patients would provide 80% power to detect a relative risk reduction of  
299 about 25% 30% in the treated group at a two-sided significance level of  $\alpha = 0.05$ . No  
300 alpha adjustments were considered since a fixed-sequence statistical approach was  
301 adopted. This strategy allows testing each of the null hypotheses at the same  
302 significance level without any adjustment, as long as the null hypotheses to be tested are  
303 hierarchically ordered and tested in a pre-defined sequential order, firstly the composite  
304 outcome, second, the mortality endpoint.

305 Statistical analyses will be done using R software version 3.6.0

306

## 307 **Local Regulations / Declaration of Helsinki**

308 The investigator will ensure that this study is carried out in full compliance with the  
309 principles of the “Declaration of Helsinki” and with the laws and regulations of the  
310 country in which the research is carried out, which provides greater protection to the  
311 individual. The study must fully adhere to the principles set forth in the “International  
312 Ethical Guidelines for Health-Related Research with Human Beings” prepared by the  
313 “Council of International Organizations of Medical Sciences (CIOMS) in collaboration  
314 with the World Health Organization (WHO).

## 315 **Publication**

316 The COLCOVID ECLA / PHRI trial will be published on behalf of the study's  
317 executive committee and all nurses and doctors who risk their lives working on the front  
318 lines in this battle to mitigate this humanitarian crisis will be listed in the appendix.

## 319 **References**

320 1. [https://www.who.int/dg/speeches/detail/who-director-general-s-opening-remarks-at-the-media-](https://www.who.int/dg/speeches/detail/who-director-general-s-opening-remarks-at-the-media-briefing-on-covid-19---18-march-2020)  
321 [briefing-on-covid-19---18-march-2020](https://www.who.int/dg/speeches/detail/who-director-general-s-opening-remarks-at-the-media-briefing-on-covid-19---18-march-2020)

322 2. Mehta P, McAuley DF, Brown M, Sanchez E, Tattersall RS, Manson JJ.  
323 COVID-19: consider cytokine storm syndromes and immunosuppression. The Lancet.  
324 doi:[https://doi.org/10.1016/S0140-6736\(20\)30628-0](https://doi.org/10.1016/S0140-6736(20)30628-0).

- 325 3. Slobodnick A, Shah B, Krasnokutsky S, Pillinger MH. Update on colchicine,  
326 2017. *Rheumatology (Oxford)*. 2018; 57:i4–i11.
- 327 4. J.C. Tardif, S. Kouz, D.D. Waters, et al. Efficacy and safety of low-dose  
328 colchicine after myocardial infarction *N. Engl. J. Med.*, 381 (2019), pp. 2497-2505
- 329 5. Yusuf S, Collins R, Peto R (1984) Why do we need some large, simple  
330 randomized trials? *Stat Med* 3: 409–422.
- 331 6. McDermott MM, Newman AB. Preserving Clinical Trial Integrity During the  
332 Coronavirus Pandemic. *JAMA*. Published online March 25, 2020.  
333 doi:10.1001/jama.2020.4689

334

335 **Appendix A**336 **Table 1 – Colchicine drug interactions**

|                                                                                                                                                                                                                                                                                                                                                                                                                                                                                                                                                                                                                                                                                                          |                                                                                                                 |
|----------------------------------------------------------------------------------------------------------------------------------------------------------------------------------------------------------------------------------------------------------------------------------------------------------------------------------------------------------------------------------------------------------------------------------------------------------------------------------------------------------------------------------------------------------------------------------------------------------------------------------------------------------------------------------------------------------|-----------------------------------------------------------------------------------------------------------------|
| Strong P-gp inhibitor<br>Ciclosporine<br>Ranolazine                                                                                                                                                                                                                                                                                                                                                                                                                                                                                                                                                                                                                                                      | Loading dose 0.5 mg (day 1) then 0.5 mg after 72 Hs. and then 0.5 mg every 72 hs for 14 days or Until discharge |
| Strong/moderate CYP3A4 inhibitor<br>Lopinavir/ritonavir<br>Lopinavir<br>Ritonavir<br>Darunavir/Ritonavir<br>Clarithromicine<br>Telitromicine<br>Nelfinavir<br>Indinavir<br>Saquinavir<br>Tripanavir/Ritonavir<br>Atazanavir<br>Voxilaprevir<br>Itraconazol<br>Ketoconazol<br>Voriconazol<br>Atorvastatin<br>Simvastatin<br>Lovastatin<br>Cloranfenicol<br>Quinidine<br>Amiodarone<br>Verapamil<br>Diltiazem<br>Eritromicine<br>Fluconazol<br>Posaconazol<br>Amprenavir<br>Aprepitant<br>Fosamprenavir<br>Ciprofloxacin<br>Fenofibrate<br>Gemfibrozil<br>Grapefruit Juice<br>Pitavastatin<br>Rosuvastatin<br>Ceritinib<br>Cobicistat<br>Conivaptan<br>Dronaderone<br>Glecaprevir<br>Indinavir<br>Nefazona | Loading dose 0.5 mg (day 1) then 0.5 mg after 72 Hs. and then 0.5 mg every 72 hs for 14 days or Until discharge |

|                                                                                                                                                       |                                                                            |
|-------------------------------------------------------------------------------------------------------------------------------------------------------|----------------------------------------------------------------------------|
| Weak CYP3A4 inhibitor<br>Azitromicine<br>Amlodipine<br>Carvedilol<br>Cilostazol<br>Naproxeno<br>Nifedipine<br>Paroxetine<br>Propafenone<br>Ticagrelor | Loading dose 1.5 mg (day 1) then 0.5 mg BID for 14 days or until discharge |
|-------------------------------------------------------------------------------------------------------------------------------------------------------|----------------------------------------------------------------------------|

337

338 **Renal Failure dose adjustment**

339 Creatinine clearance > 50 ml/min:

340 - Loading dose 1,5 mg follow by 0,5 mg 2 hours after the loading dose. (day 1)

341 - Day 2, 0,5 mg bid for 14 days or until discharge.

342 Creatinine clearance < 50ml/min:

343 - Loading dose 0,5 mg (day 1)

344 - New dose at 72 hours from the loading dose and then 0,5 mg every 72 hours  
345 until day 14 or until discharge.

346

347 **Dosage in hepatic failure**

348 **Child-pugh A:**

349 - Loading dose 1,5 mg follow by 0,5 mg 2 hours after the loading dose.(day 1)

350 - Day 2, 0,5 mg bid for 14 days or until discharge.

351 **Child-pugh B:**

352 - Loading dose 0,5 mg (day 1)

353 - New dose at 72 hours from the loading dose and then 0,5 mg every 72 hours  
354 until day 14 or until discharge.

355 **Child-pugh C:**

356 - Contraindicated

357

358

1  
2  
3  
4  
5  
6  
7

# STATISTICAL ANALYSIS PLAN

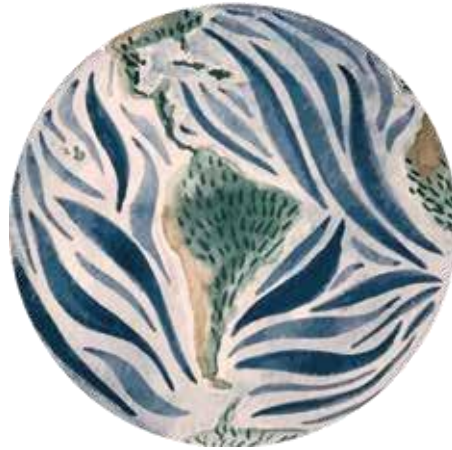

8  
9

## The ECLA PHRI COLCOVID Trial

11

**Version 3**

12

**05/02/2021**

13

14

15

16

**Protocol Title: ECLA PHRI COLCOVID Trial**

17

**Protocol Version: Version 2.1 05/02/2021**

18

**ClinicalTrials.gov Identifier: NCT04328480**

19

**Principal Investigator: Rafael Diaz**

20

21

22 **Index**

23 1. List of Abbreviations and Definitions of Terms ..... 3

24 2. Introduction ..... 4

25 3. Protocol summary ..... 4

26 3.1 Background ..... 4

27 3.2 Study objectives ..... 4

28 3.3 Treatment description..... 5

29 3.4 Eligibility..... 5

30 3.5 Study outcomes ..... 6

31 3.6 Sample size..... 6

32 3.7 Randomization and Blinding..... 6

33 3.8 Data collection..... 7

34 3.9 Interim Analyses and Data Monitoring ..... 7

35 4. General Analysis Considerations ..... 8

36 4.1 Timing of final analysis..... 8

37 4.2 Analysis Populations ..... 8

38 5. Study Data summary ..... 8

39 5.1 Subject Disposition ..... 8

40 5.2 Demographic and Baseline Variables ..... 9

41 5.3 Treatment Compliance ..... 9

42 6. Analysis..... 10

43 6.1 Outcomes definitions..... 10

44 6.2 Analysis methods ..... 13

45 6.3 Additional analysis..... 14

46 6.4 Pre-specified subgroup analyses ..... 14

47 6.5 Handling of Missing, Unused, and Spurious Data ..... 14

48 6.6 Confidence intervals and p-values ..... 15

49 6.7 Statistical software employed..... 15

50 7. Safety analysis..... 15

51 7.1 Adverse events ..... 15

52 7.2 Concomitant medication ..... 16

53 8. Reporting Conventions..... 16

54 9. Quality Assurance of Statistical Programming ..... 16

55

56

| <b>Version</b> | <b>Date of Issue</b> | <b>Summary of Change</b>                                                                                                                                                                                                                             |
|----------------|----------------------|------------------------------------------------------------------------------------------------------------------------------------------------------------------------------------------------------------------------------------------------------|
| 1.0            | 02/05/2020           | Initial version – Protocol version 1.2                                                                                                                                                                                                               |
| 2.0            | 07/12/2020           | Changes according to protocol amendment dated on November 30, 2020 <ul style="list-style-type: none"> <li>- Sample size re calculation</li> <li>- Primary and secondary outcomes redefinition</li> <li>- Pre specified subgroups analysis</li> </ul> |
| 3.0            | 05/02/2021           | Changes according to protocol version 2.1 dated on February 05, 2021: <ul style="list-style-type: none"> <li>- Secondary Outcomes specification</li> </ul>                                                                                           |

58

59 **1. List of Abbreviations and Definitions of Terms**

|      |                                   |
|------|-----------------------------------|
| Bid  | Twice a day                       |
| CI   | Confidence interval               |
| DSMB | Data and Safety Monitoring Board  |
| eCRF | Electronic case report form       |
| FU   | Follow-up                         |
| HR   | Hazard risk                       |
| IQR  | Inter quartile range              |
| ITT  | Intention to treat                |
| IWRS | Interactive Web Response Systems  |
| PCR  | Polymerase chain reaction         |
| RR   | Relative risk                     |
| SARS | Severe acute respiratory syndrome |
| SD   | Standard deviation                |
| SpO2 | Peripheral oxygen saturation      |
| WHO  | World Health Organization         |

60

61



## 62 **2. Introduction**

63 The purpose of this document is to describe the planned analysis and reporting for the  
64 ECLA PHRI COLCOVID Trial ( NCT04328480).

65 This statistical analysis plan is based on the latest version of the protocol (version 2.1)  
66 dated February 05, 2021.

## 67 **3. Protocol summary**

### 68 **3.1 Background**

69 The most important complication of COVID-19 severe cases is respiratory failure from  
70 severe acute respiratory syndrome (SARS), the leading cause of mortality.  
71 Accumulating evidence suggests that patients with severe COVID-19 might have a  
72 cytokine storm syndrome, a hyperinflammatory syndrome characterized by a fulminant  
73 and fatal hypercytokinemia and multiorgan failure.

74 Colchicine, an accessible millenary drug, widely known for its anti-inflammatory  
75 properties, has potential capacities related to immunomodulation and action on cytokine  
76 release mechanisms.

77 The ECLA PHRI COLCOVID Trial is a simple, pragmatic randomized open controlled  
78 trial to test the effects of colchicine on moderate/high-risk hospitalized COVID-19  
79 patients with the aim of reducing mortality and/or new requirement for mechanical  
80 ventilation.

### 81 **3.2 Study objectives**

82 *Primary objectives:*

- 83 • To reduce the new requirement for mechanical ventilation evaluated until 28 day  
84 or death.
- 85 • To reduce mortality evaluated until 28 day.

86 *Secondary objectives:*

- 87 • To reduce the new requirement for mechanical ventilation evaluated until 28 day  
88 or death from respiratory failure
- 89 • To reduce the new requirement for mechanical ventilation evaluated until 28 day  
90 or death from non-respiratory failure
- 91 • To reduce mortality due to respiratory failure evaluated until 28 day
- 92 • To reduce mortality due to non-respiratory failure evaluated until 28 day
- 93 • To reduce in hospital composite outcome. Evaluated during hospitalization or  
94 until death, whichever comes first, assessed up to 28 days.
- 95 • To reduce in hospital mortality. Evaluated during hospitalization or until death,  
96 whichever comes first, assessed up to 28 days
- 97 • To reduce composite outcome (New requirement for mechanical ventilation or  
98 death) evaluated in Non-intubated population.
- 99 • To reduce mortality evaluated in Non-intubated population.

- 100 • To reduce the highest WHO descriptive score of COVID-19 during  
101 hospitalization or until 28 day (whichever comes first)
- 102 • To reduce the mean WHO descriptive score of COVID-19 during hospitalization  
103 or until 28 day (whichever comes first)

104

105

### 106 **3.3 Treatment description**

107 **Control Group:** Local standard of care for COVID-19 SARS moderate / high-risk  
108 patients.

109 **Active Group:** Local standard of care for COVID-19 SARS moderate / high-risk  
110 patients plus colchicine.

111 Colchicine dosage schedule will vary according to the following scenarios:

112 *In patients not receiving Lopinavir/Ritonavir:*

- 113 • Loading dose of 1.5 mg followed by 0.5 mg after two hours (day 1)
- 114 • The next day 0.5 mg bid for 14 days or until discharge.

115 *In patients receiving Lopinavir/Ritonavir*

- 116 • Loading dose of 0.5 mg (day 1)
- 117 • After 72 hours from the loading dose, 0.5 mg every 72 hours for 14 days or until  
118 discharge.

119 *Patients under treatment with Colchicine that are starting with Lopinavir/Ritonavir*

- 120 • Dose of 0.5 mg 72 hours after starting Lopinavir/Ritonavir.
- 121 • Continue with 0.5 mg every 72 hours for 14 days or until discharge.

122 Only the oral route will be used except in the case of patients associated with  
123 mechanical ventilation or with contraindications to the oral route, in whom it will be  
124 administered by nasogastric tube.

### 125 **3.4 Eligibility**

126 ***Inclusion criteria***

- 127 • Consented adults (age  $\geq 18$  years) and
- 128 • COVID-19 suspicious and
- 129 • Admitted to hospital or already in hospital and
- 130 • COVID-19 suggestive symptoms (fever or febrile equivalent, loss of smell and  
131 taste, fatigue, etc.) that may be present or absent at randomization time and
- 132 • SARS (severe acute respiratory syndrome)
- 133 - shortness of breath (dyspnea) or
- 134 - image of typical or atypical pneumonia or
- 135 - oxygen desaturation ( $SpO_2 \leq 93$ )

136 ***Exclusion criteria***

- 137 • Clear indication or contraindication for the use of colchicine

- 138 • Pregnant or breastfeeding
- 139 • Chronic renal disease with creatinine clearance <15 ml/min/m<sup>2</sup>
- 140 • Negative PCR test for SARS-COV2

### 141 **3.5 Study outcomes**

142 *Co- Primary outcome:*

- 143 • Composite outcome: New requirement for mechanical ventilation or death
- 144 evaluated until 28 day.
- 145 • Mortality evaluated until 28 day.

146 A fixed-sequence statistical approach was adopted.

147

148 *Secondary outcome:*

- 149 • New requirement for mechanical ventilation or death from respiratory failure
- 150 • New requirement for mechanical ventilation or death from non-respiratory
- 151 failure
- 152 • Mortality due to respiratory failure
- 153 • Mortality due to non-respiratory failure
- 154 • In hospital - Composite outcome. Evaluated during hospitalization or until
- 155 death, whichever comes first, assessed up to 28 days.
- 156 • In hospital – Mortality. Evaluated during hospitalization or until death,
- 157 whichever comes first, assessed up to 28 days
- 158 • Composite outcome (New requirement for mechanical ventilation or death)
- 159 evaluated in Non-intubated population.
- 160 • Mortality evaluated in Non-intubated population.
- 161 • Mean WHO descriptive score of COVID-19 during hospitalization or until 28
- 162 day (whichever comes first)
- 163 • Highest WHO descriptive score of COVID-19 during hospitalization or until 28
- 164 day (whichever comes first)

### 165 **3.6 Sample size**

166 A minimum sample size of 1200 patients will provide 80% power to detect a relative  
167 risk reduction of approximately 27% in the treated group if the assumed 28 day-  
168 composite rate (new requirement of intubation and / or death) in the control group is  
169 about 24%.

### 170 **3.7 Randomization and Blinding**

171 Randomization will be via central IWRS. Randomization will occur in 1:1 ratio to  
172 colchicine vs. control, stratified by intubation status (intubated/ non intubated) at  
173 randomization and using randomly permuted blocks (blocks sizes: 4, 6 and 8).

174 This is an open-label study. However, while the study is in progress, access to tabular  
175 results of study outcomes by treatment allocation will not be available to the Executive

176 Committee. The Data and Safety Monitoring Board (DSMB) and the DSMB reporting  
177 statisticians will be unblinded.

### 178 **3.8 Data collection**

179 Baseline and follow-up information will be collected on trial-specific electronic case  
180 report forms (eCRFs) through REDCap web application.

181 All randomized participants will be followed up until death or 28 days post-  
182 randomization.

### 183 **3.9 Interim Analyses and Data Monitoring**

184 The DSMB will review, safety events, including outcome events, serious adverse  
185 events, and other adverse events. The DSMB Charter is describe in the document  
186 “DSMB Charter \_COLCOVID trial\_v2.0.docx”.

187 For efficacy, two formal interim analyses were planned when 50% and 75% of the  
188 patients have completed followed up. A suggested guideline for early termination is a  
189 reduction of 3 standard deviations ( $p\text{-value} < 0.0027$ ) in the composite outcome at the  
190 two interim analysis (Haybittle-Peto rule). The  $\alpha$ -level for the final analysis will remain  
191 at the conventional  $\alpha = 0.05$ .

192 The DSMB will monitor for an adverse impact of colchicine. For safety, two formal  
193 reviews were planned when 25% and 50% of the patients have completed followed up.  
194 A suggested guideline of a 3 standard deviations excess in the first analysis and a 2  
195 standard deviations excess in the second analysis would trigger discussions about  
196 stopping for harm. This safety stopping guideline does not preclude the DSMB from  
197 making recommendations at any time in the context of patient safety.

198

## 199 4. General Analysis Considerations

### 200 4.1 Timing of final analysis

201 Final analysis is planned to take place in two stages:

202 The first efficacy report will be prepared when the sample size of 1200 patients is  
203 reached and every patient has reached at least 10/15 days follow-up and data for the  
204 primary endpoint has been received and cleaned.

205 The main report/publication of the trial will be prepared when the total sample size of  
206 1200 patients is reached and every patient has reached 28 days follow-up and data for  
207 the primary endpoint has been received and cleaned.

208

### 209 4.2 Analysis Populations

210 • *Intention to treat Population (ITT)*: All randomized patients regardless of their  
211 eligibility, according to the treatment they were randomized to receive. Patients  
212 with no data available after randomization are excluded from this analysis set. This  
213 population will be used for efficacy data analysis.

214 • *Safety population*: All randomized patients who have received study treatments  
215 (active or control). Patients will be analyzed according to the treatment they  
216 actually received. Patients with no data available after randomization are excluded  
217 from this analysis set. This population will be used for safety data analysis.

218 • *Per protocol population*: All randomized patients who have received study  
219 treatments (active or control). Patients will be analyzed within the intervention  
220 group to which they were randomized after exclusion of non-compliant patients.  
221 Non-compliant patients for colchicine group are defined as patients who do not  
222 received colchicine or patients who have received colchicine but discontinued.  
223 Non-compliant patients for standard care group are defined as patients who  
224 received colchicine.

## 225 5. Study Data summary

226 All continuous variables will be summarized using the following descriptive statistics:  
227 mean, standard deviation (SD) and range if data presented a normal distribution and  
228 median, inter quartile range (IQR) and range if data skewed. The frequency and  
229 percentages (based on the non-missing sample size) of observed levels will be reported  
230 for all categorical measures. All summary tables will be structured with a column for  
231 each treatment in the order (Control, Active) and will be annotated with the total  
232 population size relevant to that table/treatment, including any missing observations.

### 233 5.1 Subject Disposition

234 A CONSORT flow diagram will be used to summarize the number of patients who  
235 were:

- 236 • randomized
- 237 • allocated to each arm

- 238 • withdrew consent at each arm
- 239 • received the randomized allocation at each arm
- 240 • did not received the randomized allocation at each arm
- 241 • completed study through day 28 at each arm
- 242 • did not completed study through day 28 at each arm
- 243 • lost to follow-up at each arm
- 244 • included in primary analysis

245

## 246 **5.2 Demographic and Baseline Variables**

247

248 The following characteristics will be summarized:

- 249 • Sex
- 250 • Age at randomization
- 251 • Dyspnea status at randomization time
- 252 • Pneumonia at randomization time
- 253 • Oxygen desaturation at randomization time
- 254 • Oxygen desaturation level at randomization time
- 255 • Respiratory status at randomization time
- 256 • Physical status at randomization time (Heart rate, Systolic blood pressure,  
257 Respiratory rate, Body temperature )
- 258 • Comorbidities (Diabetes, Hypertension, Coronary artery disease, Heart failure,  
259 Stroke, Immune suppression condition, Chronic Lung Disease, Smoking status,  
260 Chronic renal disease, Chronic liver disease, Active cancer)

261

## 262 **5.3 Treatment Compliance**

263 The number and proportion of patients who did not receive the treatment they were  
264 allocated to will be reported.

265 Treatment compliance for Colchicine arm will be assessed considering the percentage  
266 of days that the patient received colchicine. The protocol specifies the treatment  
267 duration at 14 days or until discharge.

268

269 **6. Analysis**

270 **6.1 Outcomes definitions**

271

272 **7.1.1 Co-Primary outcome #1**

273 Composite outcome: New requirement for mechanical ventilation evaluated until 28 day  
274 or death. (Worsening patients status)

275 Outcome definition:

276 • For patients who were not intubated at randomization (adm\_respstatus<4) this  
277 outcome is defined as the new requirement for mechanical ventilation at any  
278 moment during the period between 2 hours after randomization and 28 days FU or  
279 the occurrence of death from any cause during 28 days FU.

280 • For patients who were intubated at randomization or within 2 hours after  
281 randomization (adm\_respstatus=4) this outcome is defined as the occurrence of  
282 death from any cause during 28 days FU.

283 New intubations that have occurred after 28 days FU and Deaths that have occurred  
284 after 28 days FU are not considered.

285 Possible values: occurred/non occurred

286

287 Time –to- event computations:

288 • For patients who were not intubated at randomization (adm\_respstatus<4) time to  
289 composite outcome is defined as the time since randomization date to the new  
290 requirement for mechanical ventilation date or the death date (the first one during  
291 28 days FU).

292 • For patients who were intubated at randomization or within 2 hours after  
293 randomization (adm\_respstatus=4) time to composite outcome is defined as the  
294 time since randomization to the death date (during 28 days FU).

295 Patients who did not experience the outcome will be censored at day 28 or at the last  
296 day with available information (before day 28).

297

298 **7.1.2 Co-Primary outcome #2**

299 Mortality (all causes)

300 Outcome definition:

301 For all patients this outcome is defined as the occurrence of death from any cause  
302 during 28 days FU. Deaths that have occurred after this period are not considered.

303 Possible values: occurred/non occurred

304

305 Time –to- event computations:

306 For all patients, time to death outcome is defined as the time since randomization to the  
307 death date (during 28 days FU). Patients who did not experience the outcome will be  
308 censored at day 28 or at the last day with available information (before day 28).

309

310

### 311 **7.1.3 Secondary outcome #1**

312 New requirement for mechanical ventilation or death from respiratory failure

#### 313 Outcome definition:

314 • For patients who were not intubated at randomization (adm\_respstatus<4) this  
315 outcome is defined as the new requirement for mechanical ventilation at any  
316 moment during the period between 2 hours after randomization and 28 days FU or  
317 the occurrence of death from respiratory failure during 28 days FU.

318 • For patients who were intubated at randomization or within 2 hours after  
319 randomization (adm\_respstatus=4) this outcome is defined as the occurrence of  
320 death from respiratory failure during 28 days FU.

321 New intubations that have occurred after 28 days FU and Deaths that have occurred  
322 after 28 days FU are not considered.

323 Possible values: occurred/non occurred

324

### 325 **7.1.4 Secondary outcome #2**

326 New requirement for mechanical ventilation or death from non-respiratory failure

#### 327 Outcome definition:

328 • For patients who were not intubated at randomization (adm\_respstatus<4) this  
329 outcome is defined as the new requirement for mechanical ventilation at any  
330 moment during the period between 2 hours after randomization and 28 days FU or  
331 the occurrence of death from non-respiratory failure during 28 days FU.

332 • For patients who were intubated at randomization or within 2 hours after  
333 randomization (adm\_respstatus=4) this outcome is defined as the occurrence of  
334 death from non- respiratory failure during 28 days FU.

335 New intubations that have occurred after 28 days FU and Deaths that have occurred  
336 after 28 days FU are not considered.

337 Possible values: occurred/non occurred

338

### 339 **7.1.5 Secondary outcome #3**

340 Mortality due to respiratory failure

#### 341 Outcome definition:

342 For all patients this outcome is defined as the occurrence of death from respiratory  
343 failure during 28 days FU. Deaths that have occurred after this period are not  
344 considered.

345 Possible values: occurred/non occurred

346

### 347 **7.1.6 Secondary outcome #4**

348 Mortality due to non-respiratory failure



349 Outcome definition:

350 For all patients this outcome is defined as the occurrence of death from non-respiratory  
351 failure during 28 days FU. Deaths that have occurred after this period are not  
352 considered.

353 Possible values: occurred/non occurred

354

#### 355 **7.1.7 Secondary outcome #5**

356 In-hospital - Composite outcome:

357 Outcome definition:

358 • For patients who were not intubated at randomization (adm\_respstatus<4) this  
359 outcome is defined as the new requirement for mechanical ventilation at any  
360 moment during the period between 2 hours after randomization and discharge  
361 (assessed up to 28 days) or the occurrence of death from any cause during  
362 hospitalization (assessed up to 28 days).

363 • For patients who were intubated at randomization or within 2 hours after  
364 randomization (adm\_respstatus=4) this outcome is defined as the occurrence of  
365 death from any cause during hospitalization (assessed up to 28 days).

366 New intubations that have occurred after 28 days FU and Deaths that have occurred  
367 after 28 days FU and/or out-hospital are not considered.

368 Possible values: occurred/non occurred

369

#### 370 **7.1.8 Secondary outcome #6**

371 In-hospital - Mortality

372 Outcome definition:

373 For all patients this outcome is defined as the occurrence of death from any cause  
374 during hospitalization (assessed up to 28 days). Deaths that have occurred after 28 days  
375 FU and/or out-hospital are not considered.

376 Possible values: occurred/non occurred

377

#### 378 **7.1.9 Secondary outcome #7**

379 Composite outcome evaluated in Non-intubated population.

380 Outcome definition:

381 This outcome is define as was described in point “7.1.1 Co-Primary outcome #1” and  
382 will be evaluated in the Non-intubated population (adm\_respstatus<4).

383

#### 384 **7.1.10 Secondary outcome #8**

385 Mortality evaluated in Non-intubated population.

386 Outcome definition:

387 This outcome is define as was described in point “7.1.2 Co-Primary outcome #2” and  
388 will be evaluated in the Non-intubated population (adm\_respstatus<4).

389

### 390 **7.1.11 Secondary outcome #19**

391 Mean WHO descriptive score of COVID-19

#### 392 Outcome definition:

393 For each patient this outcome is defined as the mean value of the WHO descriptive  
394 COVID-19 score observed during the hospitalization or until 28 day (whichever comes  
395 first). Baseline score value is considered in the computation.

396 For patients who discharge alive from hospital, score=2 (ambulatory - limitation of  
397 activities) will be adjudicated.

398 Possible values: 2.5 - 7

399 Table 1. Ordinal Scale for Clinical Improvement (WHO)

| <b>Patient state</b>               | <b>Descriptor</b>                                            | <b>Score</b> |
|------------------------------------|--------------------------------------------------------------|--------------|
| <b>Uninfected</b>                  | No clinical or virological evidence of infection             | 0            |
| <b>Ambulatory</b>                  | No limitation of activities                                  | 1            |
|                                    | Limitation of activities                                     | 2            |
| <b>Hospitalized mild disease</b>   | Hospitalized, no oxygen therapy                              | 3            |
|                                    | Oxygen by mask or nasal prongs                               | 4            |
| <b>Hospitalized severe disease</b> | Non-invasive ventilation or high-flow oxygen                 | 5            |
|                                    | Intubation and mechanical ventilation                        | 6            |
|                                    | Ventilation + additional organ support - pressors, RRT, ECMO | 7            |
| <b>Death</b>                       | Death                                                        | 8            |

400

401

### 402 **7.1.12 Secondary outcome #10**

403 Highest WHO descriptive score of COVID-19

#### 404 Outcome definition:

405 For each patient this outcome is defined as the highest value of the WHO descriptive  
406 COVID-19 score observed during the hospitalization or until 28 day (whichever comes  
407 first).

408 Baseline score value is considered in the computation.

409 For patients who discharge alive from hospital, score=2 (ambulatory - limitation of  
410 activities) will be adjudicated.

411 Possible values: 3 - 8

412

## 413 **6.2 Analysis methods**

414 For all outcomes, ITT population will be considered and therefore comparisons will be  
415 made under the intention-to-treat principle.

416 Co-primary outcomes (composite and mortality) will be summarized with counts and  
417 percentages by randomized group.

418 Kaplan-Meier estimates curves for the time to event will be plotted.

419 Hazard risk (HR) and 95% Confidence Interval (CI) will be estimated through a Cox  
420 proportional hazard model. Adjustment by intubation status at randomization time will  
421 be considered.

422

423 In hospital- composite outcome and in-hospital mortality will be summarized with  
424 counts and percentages by randomized group. Relative risk (RR) and 95% CI will be  
425 estimated.

426

427 COVID-19 WHO descriptive score outcomes will be summarized with mean, SD,  
428 median and IQR by randomized group. T-student test and Wilcoxon test will be applied  
429 to compare the mean (or median) between groups.

430

### 431 **6.3 Additional analysis**

432 Adjustment for relevant baseline characteristics will be incorporated if important  
433 imbalances between the randomized groups are observed in baseline subgroups.

434 This will be done, for the co-primary outcome#1, through the incorporation of the  
435 corresponding term(s) in the Cox regression model in order to obtain adjusted hazard  
436 ratio estimation.

### 437 **6.4 Pre-specified subgroup analyses**

438 Pre-specified subgroup analyses will be conducted for the composite outcome.

439 Results will be presented on forest plots as HR with 95% CI. The following subgroups  
440 will be examined:

- 441 • Age (<mean age, > mean age)
- 442 • Time since hospital admission date to randomization date
- 443 • Sex (female, male)
- 444 • Positive PCR at randomization (yes/no)
- 445 • Pneumonia at baseline (yes/no)
- 446 • Hemoglobin saturation at baseline (<93% vs. >93%).
- 447 • Mechanical ventilation at randomization (yes/no)
- 448 • Diabetes (yes/no)
- 449 • Hypertension (yes/no)
- 450 • Coronary artery disease (yes/no)
- 451 • Chronic Lung Disease (yes/no)
- 452 • Smoking status (current vs former/never)
- 453 • Use of renin-angiotensin related medications (yes/no)

454

455

### 456 **6.5 Handling of Missing, Unused, and Spurious Data**

457 All reasonable attempts will be made to ensure the integrity of the data collection of this  
458 study.

459 Variables with more than 20% of missing data will not be included in the analysis. For  
460 variables that have less than 20% of missing values, firstly it will be investigated and  
461 tried to complete the missing data. Available data will be included in the data listings

462 and tabulations showing for each report the actual total. No imputation techniques will  
463 be used for missing data.

464

## 465 **6.6 Confidence intervals and p-values**

466 All applicable statistical tests will be 2-sided and will be performed using a 5%  
467 significance level.

468 All confidence intervals presented will be 95% and two-sided

469

### 470 Multiplicity adjustment

471 A fixed-sequence statistical approach was adopted. This strategy allows testing of each  
472 of the null hypotheses at the same significance level without any adjustment, as long as  
473 the null hypotheses to be tested are hierarchically ordered and tested in a pre-defined  
474 sequential order.

475 In this approach all tests are evaluated at the same significance level alpha ( $\alpha = 0.05$ ),  
476 moving to a second endpoint only after a success on the previous endpoint. This test  
477 procedure does not inflate the type I error rate as long as there is (1) prospective  
478 specification of the testing sequence and (2) no further testing once the sequence breaks,  
479 that is, further testing stops as soon as there is a failure of an endpoint in the sequence to  
480 show significance at level alpha ( $\alpha = 0.05$ ).

481 Pre-defined sequential order:

482 (1) Composite outcome: New requirement for mechanical ventilation or death  
483 evaluated until 28 day.

484 (2) Mortality evaluated until 28 day.

485

## 486 **6.7 Statistical software employed**

487 The statistical software R version 3.6.0 will be used for the interim and final analyses.

## 488 **7. Safety analysis**

### 489 **7.1 Adverse events**

490 Adverse Events of Special Interest will be captured on the case report forms and will be  
491 exempted from expedited reporting.

492 Suspected unexpected life-threatening serious adverse reactions should be reported  
493 within 24 hours, without waiting for death or discharge.

494 Serious adverse events with a reasonable causal relationship to study interventions,  
495 unexpected for the patient population under study or inconsistent with the product  
496 information (i.e., SUSARs), and that occur in participants treated with study medication  
497 will be reported to the regulatory agencies on CIOMS forms) within the required  
498 timelines.

499 All adverse events that lead to permanent discontinuation of study interventions will be  
500 recorded and included in the final study report.

501

502 A table of all adverse events of special interest will be presented with counts and  
503 percentages by group. Safety population will be considered for this analysis and relative  
504 risk and 95% CI will be estimated.

505

506 A table of all adverse events that lead to permanent discontinuation of study  
507 intervention will be presented with counts and percentages for Colchicine arm. Safety  
508 population will be considered for this analysis.

509

## 510 **7.2 Concomitant medication**

511 A table of concomitant medications will be presented with counts and percentages by  
512 group. Safety population will be considered for this analysis.

## 513 **8. Reporting Conventions**

514 P-values  $\geq 0.001$  will be reported to 3 decimal places; p-values less than 0.001 will be  
515 reported as “ $<0.001$ ”. The mean, standard deviation, and any other statistics other than  
516 quantiles, will be reported to one decimal place greater than the original data. Quantiles,  
517 such as median, or minimum and maximum will use the same number of decimal places  
518 as the original data. Estimated parameters, not on the same scale as raw observations  
519 will be reported to 3 significant figures.

520

## 521 **9. Quality Assurance of Statistical Programming**

522 A second review statistician will independently reproduce the interim and final analyses  
523 and summary statistics tables.
