# Supplementary material for: Effect of Colchicine vs Usual Care Alone on Intubation and 28-Day Mortality in Patients Hospitalized With COVID-19: A Randomized Clinical Trial
Source: PubMed Central journal article supplement (PMC8717104; doi:10.1001/jamanetworkopen.2021.41328), 2021-12-29
Supplement: jamanetwopen-e2141328-s003.pdf [file jamanetwopen-e2141328-s003.pdf]

\*Indicates required information. Only first name, last name, and suffix will appear in PubMed.

| <b>*Group Name(s): The ECLA PHRI COLCOVID Trial Investigators</b> |                   |                              |                  |                                            |                                          |                                                         |                                                                                            |
|-------------------------------------------------------------------|-------------------|------------------------------|------------------|--------------------------------------------|------------------------------------------|---------------------------------------------------------|--------------------------------------------------------------------------------------------|
| <b>*First Name and Middle Initial(s)</b>                          | <b>*Last Name</b> | <b>*Suffix (eg, Jr, III)</b> | Academic Degrees | Institution                                | Location (city, state/province, country) | Role or Contribution, eg, chair, principal investigator | Group (if more than 1 Group listed in the byline and/or Subgroup (eg, Steering Committee)) |
| Lorena                                                            | Lopez             |                              | MD               | Centro Modelo de Cardiología               | San Miguel de Tucumán, Tucumán           | Site Co-Investigator                                    |                                                                                            |
| Juan                                                              | Muntaner          |                              | MD               | Centro Modelo de Cardiología               | San Miguel de Tucumán, Tucumán           | Site Principal Investigator                             |                                                                                            |
| Antonela                                                          | Bobato            |                              | MD               | Clínica 25 de Mayo                         | Mar del Plata, Buenos Aires              | Site Co-Investigator                                    |                                                                                            |
| Gonzalo                                                           | Corral            |                              | MD               | Clínica 25 de Mayo                         | Mar del Plata, Buenos Aires              | Site Principal Investigator                             |                                                                                            |
| Gustavo                                                           | Benavent          |                              | MD               | Clínica CEMEP                              | Rio Grande, Tierra del Fuego             | Site Co-Investigator                                    |                                                                                            |
| Diego                                                             | Espinel           |                              | MD               | Clínica CEMEP                              | Rio Grande, Tierra del Fuego             | Site Principal Investigator                             |                                                                                            |
| Sandra M.                                                         | Del Valle Almagro |                              | MD               | Clínica Fusavim Privada                    | Villa María, Córdoba                     | Site Co-Investigator                                    |                                                                                            |
| Eleonora E.                                                       | Montenegro        |                              | MD               | Clínica Fusavim Privada                    | Villa María, Córdoba                     | Site Principal Investigator                             |                                                                                            |
| Adrian                                                            | Núñez             |                              | MD               | Clínica Monte Grande                       | Monte Grande, Buenos Aires               | Site Co-Investigator                                    |                                                                                            |
| Lisandro                                                          | Pérez Valega      |                              | MD               | Clínica Monte Grande                       | Monte Grande, Buenos Aires               | Site Principal Investigator                             |                                                                                            |
| Martin                                                            | Christin          |                              | MD               | Clínica Olivos                             | Vicente Lopez, Buenos Aires              | Site Co-Investigator                                    |                                                                                            |
| Leda                                                              | Guzzi             |                              | MD               | Clínica Olivos                             | Vicente Lopez, Buenos Aires              | Site Principal Investigator                             |                                                                                            |
| Gabriela                                                          | Finelli           |                              | MD               | Clínica Privada del Prado                  | Córdoba, Córdoba                         | Site Co-Investigator                                    |                                                                                            |
| Lilina B.                                                         | Schiavi           |                              | MD               | Clínica Privada del Prado                  | Córdoba, Córdoba                         | Site Principal Investigator                             |                                                                                            |
| Eduardo                                                           | Ferro Queirel     |                              | MD               | CORDIS Instituto del Corazón               | Resistencia, Chaco                       | Site Co-Investigator                                    |                                                                                            |
| Luis M.                                                           | Moltrasio         |                              | MD               | CORDIS Instituto del Corazón               | Resistencia, Chaco                       | Site Principal Investigator                             |                                                                                            |
| Horacio A.                                                        | Fermín            |                              | MD               | Hospital Británico                         | CABA, Buenos Aires                       | Site Co-Investigator                                    |                                                                                            |
| Jorge V.                                                          | Martínez          |                              | MD               | Hospital Británico                         | CABA, Buenos Aires                       | Site Principal Investigator                             |                                                                                            |
| Omar                                                              | Gutiérrez         |                              | MD               | Hospital de Campaña de Ciudad Cultural     | San Salvador de Jujuy, Jujuy             | Site Principal Investigator                             |                                                                                            |
| Eleonora                                                          | Cunto             |                              | MD               | Hospital de Infecciosas Francisco Javier N | CABA, Buenos Aires                       | Site Co-Investigator                                    |                                                                                            |
| Pablo A.                                                          | Saúl              |                              | MD               | Hospital de Infecciosas Francisco Javier N | CABA, Buenos Aires                       | Site Principal Investigator                             |                                                                                            |
| María del Pilar                                                   | Cabrera Maciel    |                              | MD               | Hospital del Este Eva Perón                | Banda del Río Salí, Tucumán              | Site Principal Investigator                             |                                                                                            |
| Javier                                                            | Muntaner          |                              | MD               | Hospital del Este Eva Perón                | Banda del Río Salí, Tucumán              | Site Co-Investigator                                    |                                                                                            |
| Damián                                                            | Lerman            |                              | MD               | Hospital Escuela Eva Perón                 | Granadero Baigorria, Santa Fe            | Site Principal Investigator                             |                                                                                            |
| Paula I.                                                          | Truccolo          |                              | MD               | Hospital Escuela Eva Perón                 | Granadero Baigorria, Santa Fe            | Site Co-Investigator                                    |                                                                                            |
| Adrián                                                            | Armano            |                              | MD               | Hospital Interzonal Presidente Perón       | Avellaneda, Buenos Aires                 | Site Co-Investigator                                    |                                                                                            |
| Esther V.                                                         | Jalife            |                              | MD               | Hospital Interzonal Presidente Perón       | Avellaneda, Buenos Aires                 | Site Principal Investigator                             |                                                                                            |
| Romina M.                                                         | Bertuzzi          |                              | MD               | Hospital Italiano                          | Córdoba, Córdoba                         | Site Principal Investigator                             |                                                                                            |
| María Inés                                                        | Jean Charles      |                              | MD               | Hospital Italiano                          | Córdoba, Córdoba                         | Site Co-Investigator                                    |                                                                                            |

## Supplemental Online Content: Nonauthor Collaborators

\*Indicates required information. Only first name, last name, and suffix will appear in PubMed.

| *First Name and Middle Initial(s) | *Last Name        | *Suffix (eg, Jr, III) | Academic Degrees | Institution                                | Location (city, state/province, country) | Role or Contribution, eg, chair, principal investigator | Group (if more than 1 Group listed in the byline and/or Subgroup (eg, Steering Committee) |
|-----------------------------------|-------------------|-----------------------|------------------|--------------------------------------------|------------------------------------------|---------------------------------------------------------|-------------------------------------------------------------------------------------------|
| Pablo A.                          | Fernandez         |                       | MD               | Hospital Municipal                         | Chivilcoy, Buenos Aires                  | Site Principal Investigator                             |                                                                                           |
| Alberto                           | Caccavo           |                       | MD               | Hospital Municipal "Dr. Raúl A. Caccavo"   | Coronel Suárez, Buenos Aires             | Site Co-Investigator                                    |                                                                                           |
| Nicolás                           | Vittal            |                       | MD               | Hospital Municipal "Dr. Raúl A. Caccavo"   | Coronel Suárez, Buenos Aires             | Site Principal Investigator                             |                                                                                           |
| Lucía                             | Lampone Tappata   |                       | MD               | Hospital Municipal de Agudos Dr. Leónid    | Bahía Blanca, Buenos Aires               | Site Co-Investigator                                    |                                                                                           |
| Diego M.                          | Murizzi           |                       | MD               | Hospital Municipal de Agudos Dr. Leónid    | Bahía Blanca, Buenos Aires               | Site Principal Investigator                             |                                                                                           |
| Brenda L.                         | Fernandez         |                       | MD               | Hospital Municipal Eva Perón               | Merlo, Buenos Aires                      | Site Principal Investigator                             |                                                                                           |
| Antonio                           | Montes de Oca     |                       | MD               | Hospital Municipal Eva Perón               | Merlo, Buenos Aires                      | Site Co-Investigator                                    |                                                                                           |
| Guadalupe                         | Díaz Vega         |                       | MD               | Hospital Municipal Manuel B. Cabrera       | Coronel Pringles, Buenos Aires           | Site Co-Investigator                                    |                                                                                           |
| Felipe N.                         | Queti             |                       | MD               | Hospital Municipal Manuel B. Cabrera       | Coronel Pringles, Buenos Aires           | Site Principal Investigator                             |                                                                                           |
| Luis A.                           | Calafell          |                       | MD               | Hospital Municipal Pigüé                   | Pigüé, Buenos Aires                      | Site Principal Investigator                             |                                                                                           |
| Mariano                           | Sequeira          |                       | MD               | Hospital Municipal Pigüé                   | Pigüé, Buenos Aires                      | Site Co-Investigator                                    |                                                                                           |
| Ricardo                           | León de la Fuente |                       | MD               | Hospital Papa Francisco                    | Salta, Salta                             | Site Principal Investigator                             |                                                                                           |
| Julio                             | Núñez Burgos      |                       | MD               | Hospital Papa Francisco                    | Salta, Salta                             | Site Co-Investigator                                    |                                                                                           |
| Sonia                             | Del Valle Armaraz |                       | MD               | Hospital Paterson                          | San Pedro, Jujuy                         | Site Co-Investigator                                    |                                                                                           |
| Patricia                          | Flores            |                       | MD               | Hospital Paterson                          | San Pedro, Jujuy                         | Site Principal Investigator                             |                                                                                           |
| Mariana                           | Bellanting        |                       | MD               | Hospital Privado                           | Rosario, Santa Fe                        | Site Principal Investigator                             |                                                                                           |
| Narela                            | Blazevich         |                       | MD               | Hospital Provincial                        | Rosario, Santa Fe                        | Site Principal Investigator                             |                                                                                           |
| Baltasar                          | Finucci Curi      |                       | MD               | Hospital Provincial                        | Rosario, Santa Fe                        | Site Co-Investigator                                    |                                                                                           |
| Romina P.                         | Cabrini           |                       | MD               | Hospital Regional A Gutiérrez              | Venado Tuerto, Santa Fe                  | Site Co-Investigator                                    |                                                                                           |
| Martín E.                         | Langone           |                       | MD               | Hospital Regional A Gutiérrez              | Venado Tuerto, Santa Fe                  | Site Principal Investigator                             |                                                                                           |
| Álvaro E.                         | Figueroa          |                       | MD               | Hospital Regional Río Gallegos             | Río Gallegos, Santa Cruz                 | Site Co-Investigator                                    |                                                                                           |
| María T.                          | Iglesias          |                       | MD               | Hospital Regional Río Gallegos             | Río Gallegos, Santa Cruz                 | Site Principal Investigator                             |                                                                                           |
| María Carolina                    | Alvero            |                       | MD               | Hospital San Bernardo                      | Salta, Salta                             | Site Co-Investigator                                    |                                                                                           |
| Cesar G.                          | Lemir             |                       | MD               | Hospital San Bernardo                      | Salta, Salta                             | Site Principal Investigator                             |                                                                                           |
| José                              | Bonorino          |                       | MD               | Hospital Universitario Austral             | Derqui, Buenos Aires                     | Site Co-Investigator                                    |                                                                                           |
| María Laura                       | Pereyra           |                       | MD               | Hospital Universitario Austral             | Derqui, Buenos Aires                     | Site Principal Investigator                             |                                                                                           |
| Ezequiel                          | Barral            |                       | MD               | Instituto Investigaciones Clínicas Rosario | Rosario, Santa Fe                        | Site Co-Investigator                                    |                                                                                           |
| Mariela                           | Rasmussen         |                       | MD               | Instituto Investigaciones Clínicas Rosario | Rosario, Santa Fe                        | Site Principal Investigator                             |                                                                                           |
| María F.                          | Daglio            |                       | MD               | Policlínico Central UOM                    | CABA, Buenos Aires                       | Site Co-Investigator                                    |                                                                                           |
| Pablo A.                          | Saúl              |                       | MD               | Policlínico Central UOM                    | CABA, Buenos Aires                       | Site Principal Investigator                             |                                                                                           |
| Mariano D.                        | Estofan           |                       | MD               | Sanatorio 9 de julio                       | San Miguel de Tucumán, Tucumán           | Site Principal Investigator                             |                                                                                           |

## Supplemental Online Content: Nonauthor Collaborators

\*Indicates required information. Only first name, last name, and suffix will appear in PubMed.

| *First Name and Middle Initial(s) | *Last Name        | *Suffix (eg, Jr, III) | Academic Degrees | Institution                              | Location (city, state/province, country) | Role or Contribution, eg, chair, principal investigator | Group (if more than 1 Group listed in the byline) and/or Subgroup (eg, Steering Committee) |
|-----------------------------------|-------------------|-----------------------|------------------|------------------------------------------|------------------------------------------|---------------------------------------------------------|--------------------------------------------------------------------------------------------|
| Francisco M.                      | Perea             |                       | MD               | Sanatorio 9 de julio                     | San Miguel de Tucumán, Tucumán           | Site Co-Investigator                                    |                                                                                            |
| Sebastián E.                      | Duhalde           |                       | MD               | Sanatorio Argentino (Centro Médico Arg)  | San Miguel de Tucumán, Tucumán           | Site Principal Investigator                             |                                                                                            |
| Sandra M.                         | Del Valle Almagro |                       | MD               | Sanatorio de la Cañada                   | Villa María, Córdoba                     | Site Principal Investigator                             |                                                                                            |
| Eleonora E.                       | Montenegro        |                       | MD               | Sanatorio de la Cañada                   | Villa María, Córdoba                     | Site Co-Investigator                                    |                                                                                            |
| María Fernanda                    | Motta             |                       | MD               | Sanatorio Güemes                         | CABA, Buenos Aires                       | Site Co-Investigator                                    |                                                                                            |
| Ignacio                           | Romero            |                       | MD               | Sanatorio Güemes                         | CABA, Buenos Aires                       | Site Principal Investigator                             |                                                                                            |
| Sebastián E.                      | Duhalde           |                       | MD               | Sanatorio Integral Luz Medica SA         | San Miguel de Tucumán, Tucumán           | Site Principal Investigator                             |                                                                                            |
| Guillermo                         | Isa Massa         |                       | MD               | Sanatorio Integral Luz Medica SA         | San Miguel de Tucumán, Tucumán           | Site Co-Investigator                                    |                                                                                            |
| Celso F.                          | García            |                       | MD               | Sanatorio Nuestra Señora del Rosario - E | San Nicolás, Buenos Aires                | Site Principal Investigator                             |                                                                                            |
| Rubén                             | García Durán      |                       | MD               | Sanatorio Nuestra Señora del Rosario - E | San Nicolás, Buenos Aires                | Site Co-Investigator                                    |                                                                                            |
| Elena                             | Cornejo Pucci     |                       | MD               | Sanatorio Parque                         | Salta, Salta                             | Site Co-Investigator                                    |                                                                                            |
| Silvia                            | Saavedra          |                       | MD               | Sanatorio Parque                         | Salta, Salta                             | Site Principal Investigator                             |                                                                                            |
| Carolina                          | Bozikovich        |                       | MD               | Sanatorio Parque                         | Rosario, Santa Fe                        | Site Co-Investigator                                    |                                                                                            |
| Luciano                           | Lovesio           |                       | MD               | Sanatorio Parque                         | Rosario, Santa Fe                        | Site Principal Investigator                             |                                                                                            |
| María J.                          | Fernandez Moutin  |                       | MD               | Sanatorio Plaza                          | Rosario, Santa Fe                        | Site Co-Investigator                                    |                                                                                            |
| Cristian C. G.                    | Forciniti         |                       | MD               | Sanatorio Plaza                          | Rosario, Santa Fe                        | Site Principal Investigator                             |                                                                                            |
| Hugo                              | Colombo           |                       | MD               | Sanatorio Privado Duarte Quiros          | Córdoba, Córdoba                         | Site Principal Investigator                             |                                                                                            |
| Nicolas                           | Sabas             |                       | MD               | Sanatorio Privado Duarte Quiros          | Córdoba, Córdoba                         | Site Co-Investigator                                    |                                                                                            |
| Leonardo                          | Pilón             |                       | MD               | Sanatorio y Clínica Lavalle              | San Salvador de Jujuy, Jujuy             | Site Co-Investigator                                    |                                                                                            |
| Adriana P.                        | Steren            |                       | MD               | Sanatorio y Clínica Lavalle              | San Salvador de Jujuy, Jujuy             | Site Principal Investigator                             |                                                                                            |
