# Supplementary material for: Effect of Colchicine vs Usual Care Alone on Intubation and 28-Day Mortality in Patients Hospitalized With COVID-19: A Randomized Clinical Trial
Source: PubMed Central journal article supplement (PMC8717104; doi:10.1001/jamanetworkopen.2021.41328), 2021-12-29
Supplement: jamanetwopen-e2141328-s004.pdf [file jamanetwopen-e2141328-s004.pdf]

## Data Sharing Statement

Diaz. Effect of Colchicine vs Usual Care Alone on Intubation and 28-Day Mortality in Patients Hospitalized With COVID-19. *JAMA Netw Open*. Published December 29, 2021.

doi:10.1001/jamanetworkopen.2021.41328

### Data

**Data available:** No

### Additional Information

**Explanation for why data not available:** Please contact the corresponding author for any questions about data availability. The Executive Committee will review any proposals for novelty, feasibility, and scientific merit.
